# Supplementary material
Source: publisher site journal article supplement (https://www.degruyterbrill.com/publication/isbn/9783110295412/downloadAsset/9783110295412_Inhaltsverzeichnis.pdf)
Supplement: Supplementary file 1 [file 9783110295412_Inhaltsverzeichnis.pdf]

# Inhalt

## Vorwort — VII

### 1 Fachliche Texte und terminologische Systeme — 1

- 1.1 Terminologisierung als Forschungsgegenstand — 1
- 1.2 Text 1: DIN 2330, Abschnitt 2 — 18
- 1.3 Text 2: Transzendente Ästhetik, Paragraph 1 — 24
- 1.4 Fazit — 33

### 2 Ermittlung absoluter Werte — 36

- 2.1 DIN 2330, Abschnitt 2 — 37
- 2.2 Transzendente Ästhetik, Paragraph 1 — 44
- 2.3 Grundlagen der statistischen Verarbeitung — 54
- 2.4 Fazit — 66

### 3 Absätze — 68

- 3.1 Mittlere Satzzahl — 68
- 3.2 Mittlere Definitionszahl — 74
- 3.3 Mittlere Textwortzahl — 77
- 3.4 Mittlere Textterminuszahl — 80
- 3.5 Mittlere Systemwortzahl — 83
- 3.6 Mittlere Systemterminuszahl — 86
- 3.7 Fazit — 90

### 4 Sätze — 96

- 4.1 Definitionsanteil — 96
- 4.2 Mittlere Textwortzahl — 99
- 4.3 Mittlere Textterminuszahl — 105
- 4.4 Mittlere Systemwortzahl — 108
- 4.5 Mittlere Systemterminuszahl — 111
- 4.6 Fazit — 114

### 5 Definitionen — 119

- 5.1 Mittlere Textwortzahl — 119
- 5.2 Mittlere Textterminuszahl — 132
- 5.3 Mittlere Systemwortzahl — 140
- 5.4 Mittlere Systemterminuszahl — 146
- 5.5 Fazit — 152

## **XII — Inhalt**

### **6 Wörter und Termini — 157**

- 6.1 Textterminusanteil — 157
- 6.2 Systemwortanteil — 160
- 6.3 Systemterminusanteil (1) — 163
- 6.4 Systemterminusanteil (2) — 165
- 6.5 Fazit — 168

### **7 Terminologische Progression — 171**

- 7.1 Terminologische Rekurrenz — 171
- 7.2 Terminologische Frequenz — 188

### **8 Diskussion — 204**

- 8.1 Befunde — 204
- 8.2 Hypothesen — 217
- 8.3 Indices und Aspekte — 224

### **Schluss — 230**

### **Quellen — 235**

### **Literatur — 235**
